# Supplementary material for: Growth of Chitinophaga pinensis on Plant Cell Wall Glycans and Characterisation of a Glycoside Hydrolase Family 27 β-l-Arabinopyranosidase Implicated in Arabinogalactan Utilisation
Source: PubMed Central journal article supplement (PMC4598101; doi:10.1371/journal.pone.0139932), 2015-10-08
Supplement: pone.0139932.s001.pdf [file pone.0139932.s001.pdf]

## S1. Supporting information

### Supporting tables

Table A. Primers used to produce mutant forms of the Cpin\_5740 gene.

| Mutation | Forward primer                              | Reverse primer                              |
|----------|---------------------------------------------|---------------------------------------------|
| I56A     | tggcaatacattatagtagacGCAcgctggatgtggccaatg  | cattggccacataccagcgTGCgttactataatgtattgcca  |
| I56C     | tggcaatacattatagtagacGTGcgctggatgtggccaatg  | cattggccacataccagcgACAgcttactataatgtattgcca |
| I56D     | tggcaatacattatagtagacGATcgctggatgtggccaatg  | cattggccacataccagcgATCgttactataatgtattgcca  |
| I56E     | tggcaatacattatagtagacGAGcgctggatgtggccaatg  | tggcaatacattatagtagacGATcgctggatgtggccaatg  |
| D187A    | gacttcgtaaaagtaGCAgatctctcccccctatttac      | gtaaataggggcggagagatcTGCtacttttacgaagtc     |
| D242A    | gtggcgctactgtcgatGCAttctgggataactggccccacct | aggtggggccagttatccagaaTGCatcgacagtagccac    |

Table B. Non-characterised protein sequences included in the phylogenetic analysis.

| Uncharacterised protein <sup>a</sup>   | Characterised homologue | Sequence identity |
|----------------------------------------|-------------------------|-------------------|
| H1Y2N6 <i>Mucilaginibacter paludis</i> | <i>CpArap27</i>         | 72 %              |
| W6UJJ5 <i>Pedobacter</i> sp            | <i>CpArap27</i>         | 67 %              |
| E2NCR7 <i>B. cellulosilyticus</i>      | <i>CpArap27</i>         | 63 %              |
| J1KQR8 <i>Flavobacterium</i> sp        | <i>CpArap27</i>         | 79 %              |
| A5FFA1 <i>F. johnsoniae</i>            | <i>CpArap27</i>         | 57 %              |
| B5I744 <i>S. sviveus</i>               | <i>CjAga27A</i>         | 49.8 %            |
| L7ETW0 <i>S. turgidiscabies</i>        | <i>SeMelA</i>           | 57.9 %            |
| T1UZ55 <i>A. mediterranei</i>          | <i>CmAga27A</i>         | 48.6 %            |
| W4NUI7 <i>B. caribensis</i>            | <i>CjAga27A</i>         | 38.5 %            |
| K7D6T7 <i>P. troglodytes</i>           | <i>Hsa-GAL</i>          | 98 %              |
| F1PGD0 <i>C. familiaris</i>            | <i>Hsa-GAL</i>          | 85 %              |
| G7XCA9 <i>A. kawachii</i>              | <i>TrAgl1</i>           | 54 %              |
| I8ADE3 <i>A. oryzae</i>                | <i>TrAgl1</i>           | 57 %              |
| A1D0A3 <i>N. fischeri</i>              | <i>AnAglA</i>           | 66 %              |
| B8N306 <i>A. flavus</i>                | <i>AnAN7152.2</i>       | 62.5 %            |
| B8MWJ5 <i>A. flavus</i>                | <i>AnAglA</i>           | 69 %              |
| G5D7B5 <i>A. niger</i>                 | <i>AnAglA</i>           | 97 %              |
| E9FBI1 <i>M. anisopliae</i>            | <i>AnAglA</i>           | 47 %              |
| Q9HFB1 <i>Acremonium</i> sp            | <i>AnAglA</i>           | 45 %              |

<sup>a</sup>Proteins are identified by UNIPROT code and organism name.

<sup>b</sup>Other proteins that have not biochemically characterised, but were included in the tree because a crystal structure is available, are Q9KBQ5 (*B. halodurans*), Q5LFG6 (*B. fragilis*) and Q5L7T7 (*B. fragilis*); these proteins are indicated on the phylogenetic tree along with their PDB codes.

## Supporting figures

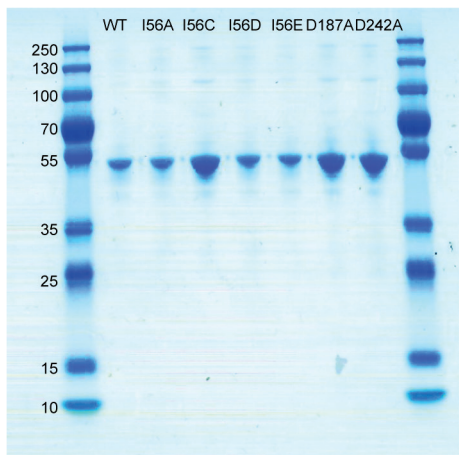

Fig A. Coomassie blue-stained gel obtained by SDS-PAGE of purified wild-type and mutant forms of *CpArap27*. Wild-type (WT) *CpArap27* and all variants were purified on previously unused nickel resin to comparable purity and homogeneity. The size of the protein without signal peptide was predicted to be 48.0 kDa.

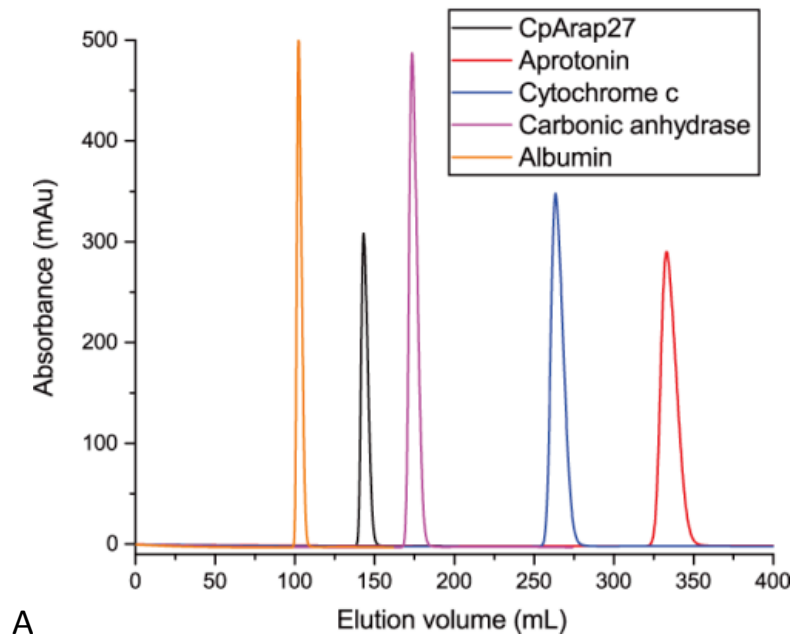

A

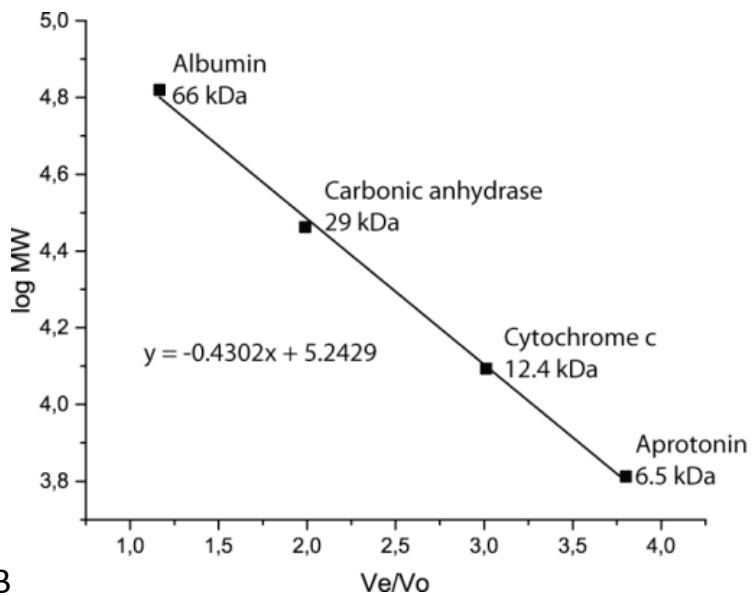

B

Fig B. Size-exclusion chromatography of *CpArap27*. A. Overlay of chromatograms of molecular mass standards and *CpArap27*. *CpArap27* eluted as a single, sharp peak, with no evidence of oligomers at the void volume. B. Calibration curve. The observed peak elution volume of *CpArap27* was 135 mL, corresponding to a  $v_e/v_o$  value of 1.324 and a molecular mass of 47 kDa (*cf.* Fig. S1).

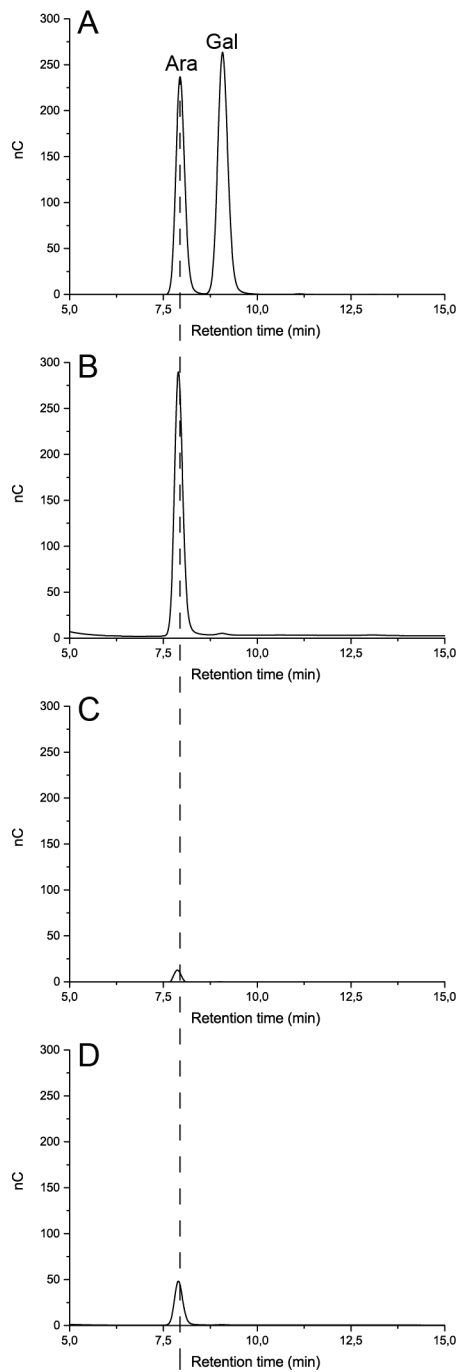

Fig C. HPAEC-PAD of products release from larch wood arabinogalactan by wild-type and mutant forms of *CpArap27*. HPAEC of arabinose and galactose standards (A), against which are compared the reaction products of three enzyme variants: wild-type (B), I56D (C) and I56E (D). Arabinose is the sole reaction product released from larch wood arabinogalactan in all cases.

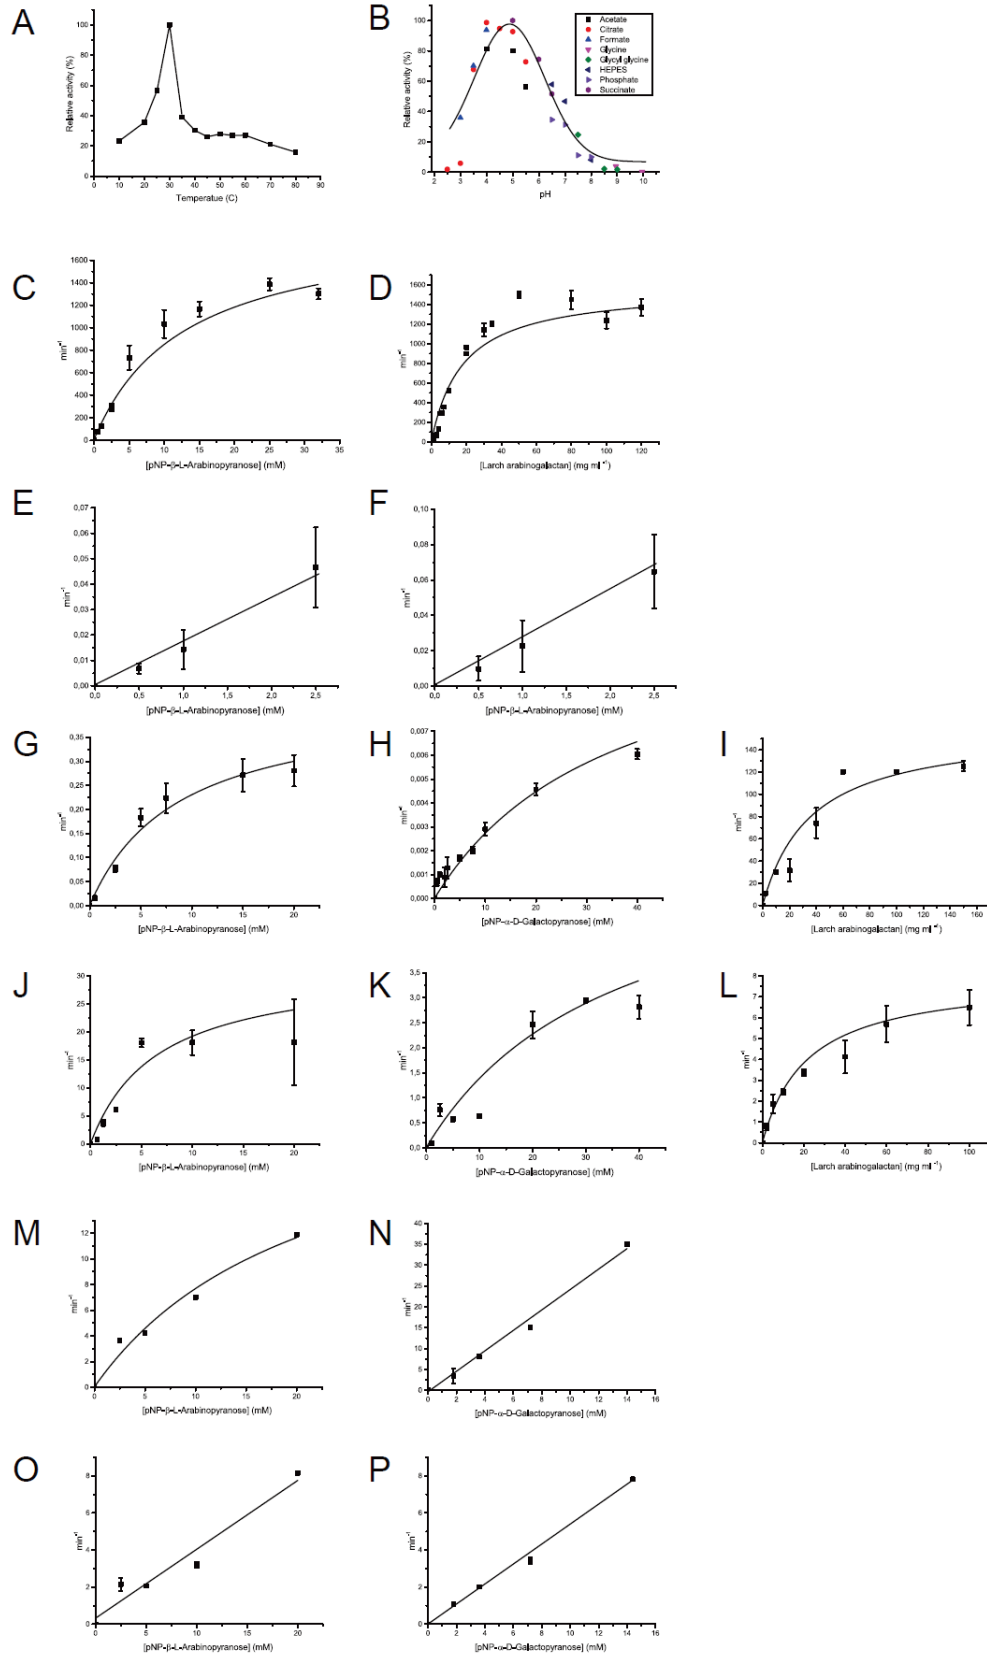

Fig D. Biochemical analysis of wild-type and mutant forms of *CpArap27*. (A) Optimum temperature conditions determined for the wild-type enzyme, using a stopped assay to analyse hydrolysis of the pNP- $\beta$ -L-Arap substrate. (B) pH optimum of the wild-type enzyme, determined using the same assay,

displayed with a Gaussian fit of the data. (C and D) Kinetic analysis of the wild-type enzyme against pNP- $\beta$ -L-Arap and larch wood arabinogalactan, respectively. (E and F) Kinetic analysis of the D187A and the D242A catalytic mutants, respectively, against pNP- $\beta$ -L-Arap. (G, H and I) Kinetic analysis of the I56D variant against pNP- $\beta$ -L-Arap, pNP- $\alpha$ -D-Galp and larch wood arabinogalactan, respectively. (J, K and L) Kinetic analysis of the I56E variant against pNP- $\beta$ -L-Arap, pNP- $\alpha$ -D-Galp and larch wood arabinogalactan respectively. (M and N) kinetic analysis of the I56C variant against pNP- $\beta$ -L-Arap and pNP- $\alpha$ -D-Galp respectively. (O and P) kinetic analysis of the I56A variant against pNP- $\beta$ -L-Arap and pNP- $\alpha$ -D-Galp respectively. For kinetic analysis of hydrolysis of the pNP- $\beta$ -L-Arap substrate, a continuous assay reading absorbance at 410 nm was used. For kinetic analysis of the cleavage of arabinose side chains from larch wood arabinogalactan, a linked galactose dehydrogenase assay was used, reading absorbance at 340 nm. Full descriptions of both assays are given in Experimental Procedures. All graphing and curve fitting was performed using Origin 9.1.
